# Supplementary material for: Automated hierarchical classification of protein domain subfamilies based on functionally-divergent residue signatures
Source: PubMed Central journal article supplement (PMC3599474; doi:10.1186/1471-2105-13-144), 2012-06-22

# Automatic generation of protein domain hierarchies based on functionally-divergent residue signatures

## **Additional File 1**

Andrew F. Neuwald, Christopher J. Lanczycki and Aron Marchler-Bauer

Additional figures referred to in the main article as Figures S1–S6.

**Figure S1. Output contrast hierarchical alignments.**

**Figure S2. Recursive analysis of the Ras-like subgroup .**

**Figure S3. Output of our program for comparing two hierarchies.**

**Figure S4. An example output file from our jackknife procedure.**

**Figure S5. An example output file from our simulation procedure.**

**Figure S6. A CDD “sequence tree” computed from the amcBPPS hierarchy for RRM domains.**





**Figure S3. Output of our program for comparing two hierarchies.**

This reveals the degree to which the curated and automatic hierarchies for the PI3Kc\_like domain (cd00142) overlap. Shown in parentheses are both the numbers of sequences at each level of the hierarchy and the number at that level assigned to various level of the other hierarchy. The common subgroups are color coded between the two hierarchies (i.e., FD-tables) for clarity.

**Automated vs curated sets:**

```
+-----oo--ooo- 1.Set21? (86)-> cd00896(15) cd05172(4) [60 parent; 1 reject] (3 other internal) + 3.
++-oo---oo--ooo- 2.Set1? (114)-> cd05169(54) cd05170(13) cd00892(6) [40 parent] + 1.
+++-----oo--ooo- 3.Set11? (1)-> cd05171(1).
++++-----oo--ooo- 4.Set17! (194)-> cd00892(189) [5 parent].
+++++-----oo--ooo- 5.Set16! (187)-> cd05171(185) [2 parent].
++-oo+---oo--ooo- 6.Set12! (244)-> cd05169(244).
+-oo-+-oo--ooo- 7.Set9! (54)-> cd05170(54).
+-----oo+---ooo- 8.Set3? (65)-> cd05167(24) cd05168(23) [18 parent].
+-----oo+---ooo- 9.Set10! (252)-> cd05167(252).
+-----oo+---ooo- 10.Set8! (301)-> cd05168(296) [5 parent].
+-----oo+---ooo- 11.Set7! (180)-> cd05163(180).
+-----oo+---ooo- 12.Set2? (33)-> cd00894(2) cd05175(2) (29 other internal).
+-----oo+---ooo- 13.Set4! (103)-> cd05177(21) cd00895(20) cd05176(19) [43 parent].
+-----oo+---ooo- 14.Set18! (202)-> cd00894(22) cd05174(17) cd05173(16) cd05175(15) [132 parent].
+-----oo+---ooo- 15.Set6! (255)-> cd00896(255).
+-----oo+---ooo- 16.Set5! (68)-> cd05172(65) [3 parent].
-ooooooooooooooo 17.Reject (70)-> cd05163(35) [2 parent; 31 reject] (2 other internal).
```

**Inverse comparison:**

```
+-----oo+---ooo- 1.cd00142? (59)-> Set5(3) Set16(2) [51 parent; 2 reject] + 1.
++-oooo-oo-oo-oooo 2.cd00891? (56)-> Set18(34) [22 parent].
+++-----oo-oo-oooo 3.cd00896! (270)-> Set6(255) [15 parent].
+++++-----oo-oo-oooo 4.cd05165? (104)-> Set18(98) [6 parent].
+++++-----oo-oo-oooo 5.cd00894! (24)-> Set18(22) [2 parent].
+++++-----oo-oo-oooo 6.cd05173! (16)-> Set18(16).
+++++-----oo-oo-oooo 7.cd05174! (17)-> Set18(17).
+++++-----oo-oo-oooo 8.cd05175! (17)-> Set18(15) [2 parent].
++-oooo+---oo-oooo 9.cd05166? (47)-> Set4(43) [4 parent].
++-oooo+---oo-oooo 10.cd00895! (20)-> Set4(20).
++-oooo+---oo-oooo 11.cd05176! (19)-> Set4(19).
++-oooo+---oo-oooo 12.cd05177! (21)-> Set4(21).
+-----oo+---ooo- 13.cd00893? (25)-> Set8(4) [21 parent].
+-----oo+---ooo- 14.cd05167! (276)-> Set10(252) [24 parent].
+-----oo+---ooo- 15.cd05168! (319)-> Set8(296) [23 parent].
+-----oo+---ooo- 16.cd05163! (215)-> Set7(180) [35 reject].
+-----oo+---ooo- 17.cd05164? (53)-> Set17(5) [46 parent; 2 reject].
+-----oo+---ooo- 18.cd00892! (196)-> Set17(189) [7 parent].
+-----oo+---ooo- 19.cd05169! (298)-> Set12(244) [54 parent].
+-----oo+---ooo- 20.cd05170! (68)-> Set9(54) [14 parent].
+-----oo+---ooo- 21.cd05171! (188)-> Set16(185) [3 parent].
+-----oo+---ooo- 22.cd05172! (69)-> Set5(65) [4 parent].
-ooooooooooooooo 23.Reject (32)-> [31 reject] (1 other internal).
```











**Figure S6. A CDD “sequence tree” computed from the amcBPPS hierarchy for RRM domains.**

This screen shot shows part of a “sequence tree” computed from the input sequences used for the amcBPPS analysis of RRM domains shown in Table 3. The pair-wise sequence similarities used to construct the tree were calculated using a version of the gapped BLAST program termed pBLAST. The tree is colored according to the sub-groups in the automatically generated hierarchy.

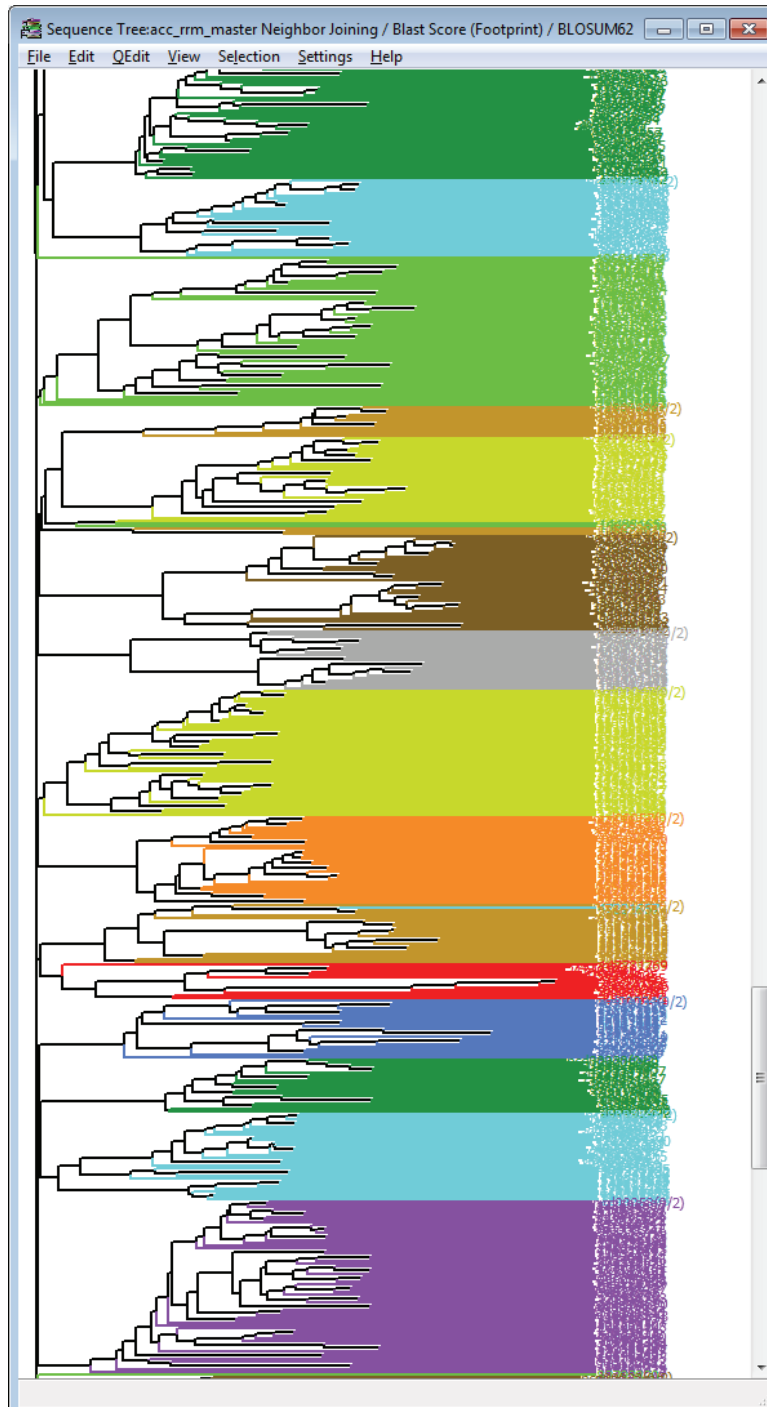

Supplement: 1471-2105-13-144-S1.pdf [file 1471-2105-13-144-S1.pdf]
